# Supplementary material for: H3K4me3 Histone ChIP-Seq Analysis Reveals Molecular Mechanisms Responsible for Neutrophil Dysfunction in HIV-Infected Individuals
Source: Front Immunol. 2021 Jul 15;12:682094. doi: 10.3389/fimmu.2021.682094 (PMC8320512; doi:10.3389/fimmu.2021.682094)
Supplement: Supplementary Table 6 — The list of all target genes in the GO term ‘Apoptotic process’ GO:0006915, ‘Histone methyltransferase complex GO:0035097 and ‘Histone acetyltransferase complex’ GO:0000123 divided into HIV specific, HC specific and common for both groups. [file Table_6.xls]

## Sheet: S Tabel6
	Supplementary Tabel 6.
	Apoptotic process; GO:0006915				histone methyltransferase complex; GO:0035097				histone acetyltransferase complex; GO:0000123
		Genes in Term	Target Genes in Term			Genes in Term	Target Genes in Term			Genes in Term	Target Genes in Term
	HC	1611	948		HC	86	62		HC	85	76
	HIV1	1611	727		HIV1	86	71		HIV1	85	59
	Apoptotic process; GO:0006915				histone methyltransferase complex; GO:0035097				histone acetyltransferase complex; GO:0000123
	HC-specific (n=276)	HIV-specific (n=55)	common for HC and HIV (n=672)		HC-specific (n=4)	HIV-specific (n=13)	common for HC and HIV (n=58)		HC-specific (n=18)	HIV-specific (n=1)	common for HC and HIV (n=58)
	HAX1	CARD10	TRIM24		ZNF462	KDM4A	MAX		MORF4L2	TAF9	EP300
	RET	ISL1	NLRP1		SENP3	ZNF827	KDM6A		TAF6L		KAT5
	CARD16	POU3F3	DNAJC3		RBBP4	KAT8	SUZ12		BRD8		MEAF6
	TP73	MCL1	NAA15		TAF9	LAS1L	CXXC1		KAT8		CREBBP
	MIR24-2	BBC3	XIAP			WDR5	PELP1		DPF3		BRPF3
	ALDH1A3	NDUFS3	NPM1			RBBP5	PHF1		TAF9B		KANSL1
	MRE11	DDX42	SELENOS			HDAC9	MGA		TAF2		UBAP2L
	UBA52	TRADD	MIEN1			PRDM4	NCOA6		OGT		TADA1
	INCA1	HTT	BARD1			PRMT5	CHD8		WDR5		TAF5L
	SIRT4	PSENEN	AMBRA1			MEN1	KANSL1		SUPT7L		POLE3
	LRP1	TAF9	EEF2K			TRIM37	ASH2L		JADE3		TADA2A
	TNFSF10	HSP90B1	TXNDC5			RUVBL2	RNF2		PHF10		HCFC1
	TNFRSF10A	MIR125B1	SNX6			TAF6	KDM5C		DMAP1		TAF10
	LATS1	FBH1	HEY2				REST		ING3		BRPF1
	SOX2	BTG1	DAPK2				HCFC2		KANSL3		TAF5
	MAPK8IP2	FOXA1	CREBBP				KMT2A		MBIP		ZZZ3
	PRDX5	ING4	BAG3				C17orf49		RUVBL2		ING4
	HDAC1	C3orf38	PMAIP1				HCFC1		TAF6		ENY2
	TFDP2	YME1L1	MAEA				SIRT1				KAT7
	HSPB1	NTSR1	ZPR1				KMT2D				SUPT20H
	MTCH2	IER3	RASSF3				AEBP2				USP22
	ITGAM	NCSTN	PPP1CA				SETD1B				BRD1
	AIFM1	PRKDC	PIK3CD				PRDM10				PHF20
	LMNA	EIF2S1	FXN				WDR82				JADE1
	RABGGTA	CRYAB	AVEN				KMT2C				YEATS4
	TFAP4	MEIS3	SENP1				PHF20				MSL1
	MYDGF	AGO4	BAK1				KDM4B				TRRAP
	MAP3K12	SON	PLK3				ZNF451				RUVBL1
	STXBP1	POR	ZBTB16				RUVBL1				DR1
	IER3IP1	DAPK1	AATF				MTF2				ACTB
	ZMYND11	HIF1A	LRRK2				HDAC2				ACTL6A
	STPG1	SHC1	SMPD1				ZNF507				YEATS2
	MYBL2	TCP1	C5AR1				DPY30				EP400
	SRA1	NOL3	ARF4				TAF1				KAT2B
	LCMT1	DDIAS	ABR				SETD1A				DPF2
	TRAP1	VAV3	DDX3X				PHF19				RSF1
	CEACAM5	KCNB1	BRMS1				ZNF513				EPC1
	ARHGAP10	SIRT2	PLCG1				EZH1				KANSL1L
	PIK3CG	TNFSF12	DNM1L				PAXIP1				MRGBP
	FOXQ1	NOG	RPS27A				PAGR1				MORF4L1
	MAP2K5	SLIT2	MYO18A				EED				KANSL2
	SOCS2	NNT	NOD2				POGZ				MAP3K7
	MPO	GIMAP8	MAP3K11				EZH2				MCRS1
	HMOX1	COA8	GSK3B				ZNF335				MSL2
	ZNF420	GDF7	FIS1				INO80C				EPC2
	RTKN2	THOC6	ERCC5				E2F6				JADE2
	BAG6	TWIST1	RPS3				KDM6B				POLE4
	ATF2	CD40	ADAM8				MCRS1				SUPT3H
	PERP	SPHK2	SERINC3				KDM5B				ATXN7L3
	STAMBP	PRKCH	PDCD4				RBBP7				ING5
	TFAP2B	WNT10B	MEF2C				KDM5A				KAT6B
	NKX3-2	AGAP2	HMGB1				TEX10				TAF4
	ECT2	DHRS2	LATS2				EPOP				TADA2B
	FGFR1	IHH	ITGA6				TAF4				TAF7
	NME1	SHH	SLK				KMT2B				MSL3
	CDK19		TRIO				TAF7				TAF12
	RPS7		EN2				KDM4C				SGF29
	ALX4		EIF2AK4				JARID2				KAT6A
	MAD2L1		APH1B
	TM7SF3		MERTK
	LRP8		CDC73
	MAPT		DDRGK1
	HMGA2		JUN
	NKX3-1		BNIP1
	DHODH		SQSTM1
	MARCH7		TSPO
	NLRP12		MAPK9
	GSTP1		MAP3K9
	CAPN2		ADORA2A
	IRAK1		ANP32B
	DRD3		MAPK7
	PLEKHF1		CASP1
	UBB		INHBA
	ITM2C		SERBP1
	PNMA1		MYB
	ANXA1		HMGCR
	PTPRC		TMF1
	ID3		RB1CC1
	DELE1		HIP1
	PML		BCLAF1
	GDNF		ILK
	OSR1		RHOB
	ADCY10		STK17A
	IGBP1		RBM5
	CSF1R		ING5
	TRIM2		DEDD
	HDAC6		GDF11
	LPAR1		ZNF830
	IL6ST		RPS6KA3
	XRCC2		MAPK8
	APH1A		MNT
	CDK4		IVNS1ABP
	ATOX1		INPP5D
	CDK1		PDK4
	SUPV3L1		EIF2AK3
	NR2E1		FKBP8
	PAFAH2		APC
	DFFA		ZNF16
	PHB2		GRINA
	LRP6		GDF5
	BNIP3		MFF
	IFIT3		HCAR2
	MIR222		BID
	ARAF		HSPA1A
	ITGB3BP		EIF2AK2
	SARM1		SP100
	SFN		CASP2
	ID1		ANKRD13C
	NDUFA13		REST
	IL1B		CDKN2D
	PIN1		RELA
	CASP10		DCPS
	CTH		NAE1
	BIRC3		STK40
	NOP53		DOCK8
	USP36		SFPQ
	ARMCX5		PHIP
	GPRASP2		GAPDH
	PTGS2		RIPK2
	ALDH1A2		GSK3A
	SAP18		HSP90AB1
	RETREG1		MAP4K4
	BCL2L12		LGALS1
	BIN1		RNPS1
	DYRK3		E2F3
	APBB1		HTATIP2
	PSMD10		ACTN1
	TMEM161A		WNT11
	TFAP2A		DNAJA1
	FAIM		TWIST2
	TNF		IRS2
	HMGN5		G0S2
	API5		PAM16
	MAPK8IP1		HIPK2
	MGMT		PROC
	RPS3A		PRKCZ
	E2F1		NCK2
	TFPT		RPS6KB1
	ASAH2		RGL2
	GPX1		GNA13
	ARHGEF9		BAG1
	ARHGEF4		SETX
	TCTN3		PIAS4
	NIBAN2		ITPKB
	MDM4		SHQ1
	DLC1		TMBIM4
	SEPTIN4		SRSF6
	TEX261		TRAF2
	IL12A		BIK
	RPL10		SGMS1
	MIR26B		PDIA3
	NONO		CTSZ
	DEPTOR		AKT1S1
	CCAR2		IP6K2
	AURKB		ICAM1
	ARHGEF26		ADA
	PCGEM1		PDCD10
	NCKAP1L		CTSC
	AIF1		CFDP1
	TBX1		ARHGEF1
	TRAF5		BAX
	ZNF304		ANXA5
	HIP1R		TMBIM6
	MECOM		S100A9
	SLC7A11		PDPK1
	CCL21		TNFAIP3
	LEP		ITGA4
	CSNK2A2		RAPGEF2
	RPL26		PIK3R1
	MIR320A		USP42
	FBXO10		GRIN1
	FAS		LDHA
	QARS		HYOU1
	PPP1R13B		RASSF2
	NDRG1		PIM3
	AIFM2		RACK1
	FLT3		STX4
	MOAP1		FOXC1
	ASNS		UBC
	CASP8		TNFRSF1B
	KIT		PTPMT1
	PRKCQ		NOD1
	UBQLN1		MPZ
	SNCA		XBP1
	NLRC4		NR4A3
	HDAC4		HMGB2
	NDNF		PIP5KL1
	HPGD		ITGAV
	ATF6		PSME3
	ATG5		YWHAH
	AREL1		FAF1
	SDF2L1		DEDD2
	TPD52L1		TPT1
	SRC		SUDS3
	PAK4		CSNK2A1
	ZNF205		CDKN1A
	MIR133A2		BIRC2
	CHM		HYAL2
	SGK3		PRNP
	YBX3		RPS6KA2
	MED1		CTNNB1
	CTSH		P4HB
	NET1		NOC2L
	FZD3		ENO1
	ACER3		RYBP
	FLT3LG		PLK1
	WWOX		RBCK1
	PRDX3		ATF4
	UNG		MICAL1
	CAPN10		HSPA5
	UFL1		TNFAIP8L1
	TNFSF14		PELI1
	ARG2		FLNA
	TMC8		BRCA1
	F3		VEGFA
	PSEN2		PRKRA
	CTTN		VCP
	RBM10		BFAR
	OGG1		ZNF622
	LAMP3		MIR17HG
	CYP1B1		TNFRSF1A
	GDF9		UBE2B
	YAP1		PPP3CC
	TAF9B		KLF11
	MDK		CLN3
	BMP8A		PLEKHG2
	ARHGEF19		TYRO3
	PSMC5		BMF
	ZC3H8		FOXO1
	PPARGC1A		LGALS3
	ANGPT1		ITPRIP
	BMP8B		NAA16
	CTNNA1		ZFP36L1
	PYCARD		SLC35F6
	MIR29B1		C1QBP
	IL20RA		LTBR
	ATP5IF1		BMP2
	NMNAT1		ZBTB7A
	ING3		RB1
	LIG4		TIGAR
	DAPK3		IGF1R
	MNAT1		PAK2
	NSMF		ARL6IP1
	FGD4		SLC9A1
	TMEM14A		TOMM22
	NLRP3		URI1
	MUL1		PIM1
	MTOR		AMIGO2
	COL18A1		NAA38
	ARHGEF16		CRADD
	RRN3		NQO2
	STEAP3		RIPK3
	APIP		MALT1
	BAG5		STRADB
	BAG4		SCRIB
	CREB3L1		KRAS
	GLO1		TCF7
	CASP4		BCL2L13
	ARHGEF6		STYXL1
	BHLHB9		NSMAF
	TLE1		IRF5
	CASP6		TCF7L2
	TLE5		CDK5R1
	ACTN2		FBXO11
	TOP2A		NANOS3
	CTNNBL1		TXNDC12
	EEF1A2		RNF122
	PLA2G6		KHDC1
	CARD6		PRKN
	CLEC7A		NF2
	TNFAIP8L3		TRAF7
	CD74		CD248
	ACER2		RIPK1
	MAP2K6		RSL1D1
			KDM2B
			LYN
			PRR7
			STIL
			BCAP31
			KDM1A
			RPL11
			VAV1
			MDM2
			TNFAIP8
			HIGD1A
			SIRT5
			DNAJB6
			NRBP2
			PLCG2
			IKBKB
			FGD3
			BCL6
			PDCD2
			TARDBP
			CORO1A
			SPTLC1
			EGLN3
			OMA1
			PPIF
			SIRT1
			SOS2
			PARP1
			AKT1
			FIGNL1
			PPT1
			BTG2
			YWHAQ
			AKAP13
			DSTYK
			BNIP2
			SMAD3
			TRAF1
			KLF4
			FZD9
			ATG7
			IRF7
			NCOA1
			EEF1E1
			ZC3HC1
			MMP9
			CPEB4
			DAP
			CTSB
			ZNF346
			FOXP1
			PTPN2
			MARK4
			PTPN1
			SLC9A3R1
			LGALS9
			SGK1
			CD44
			SYK
			DUSP1
			EIF2B5
			RHOA
			PPM1F
			PLAUR
			TNFRSF10B
			NUAK2
			ITGA5
			TRIM35
			ARHGEF12
			PELI3
			PIK3CB
			PPARD
			PDCD6
			HSPA9
			CXCR4
			SET
			TMEM219
			HNRNPK
			HIPK3
			PHLDA3
			P2RX1
			RAD9A
			ACVR1
			ADAM10
			TSC22D3
			S100A8
			CAMK1D
			PRKCA
			SIN3A
			YWHAE
			PARK7
			AARS
			PPP2R1B
			PA2G4
			PIAS1
			ZFP36
			RPS6
			PIK3CA
			DNMT1
			FRS2
			AKT2
			CLCF1
			CASP9
			EYA3
			BNIP3L
			RRP1B
			DDX20
			SAV1
			GNAI3
			HCK
			TP53I3
			SKIL
			DDAH2
			SH3RF1
			PLK2
			ARL6IP5
			PTPA
			ITGB1
			TNFRSF10D
			ARRB2
			ZMAT3
			HDAC2
			USP47
			DNAJC5
			IFT57
			GRK5
			EGR1
			TP53INP1
			PRKAA1
			GADD45G
			SLC25A27
			RNF34
			CYCS
			NOTCH2
			TNFRSF10C
			PSEN1
			PDCD5
			GAS1
			JMY
			CFLAR
			CALR
			DAD1
			MYC
			PRELID1
			MSH2
			TNFRSF12A
			BCL2L11
			CTSD
			CCND2
			GNAI2
			HYPK
			SYNGAP1
			SIGMAR1
			ANXA4
			ANO6
			PTTG1IP
			FAM162A
			RASA1
			CAT
			RRM2B
			PPP3R1
			NR4A2
			PROK2
			MAP3K5
			MAP2K4
			CDKN2A
			TRAF6
			DUSP6
			BIRC6
			THRA
			RPS6KA1
			RAF1
			CAST
			CD274
			EGR3
			BCL2L1
			SIAH1
			CHD8
			PPID
			TXNIP
			CDKN1B
			ADAR
			BCL3
			TP53BP2
			ARHGEF17
			CASC2
			NAA35
			TMBIM1
			CFL1
			CASP8AP2
			GPX4
			ANKLE2
			CXCR2
			VDAC2
			PREX1
			ATF3
			CBL
			ERC1
			YWHAG
			PRDM11
			VDR
			CAMK2D
			FYN
			EGLN2
			STK26
			LHX4
			G6PD
			DNAJA3
			STAT1
			ALKBH1
			TRAF3
			BMPR1A
			ARHGEF3
			BRAF
			MECP2
			GRAMD4
			RTN4
			LANCL1
			OPA1
			DIP2A
			FOXO3
			SIX4
			ABL1
			PPP1R10
			PTEN
			FLCN
			FEM1B
			CITED2
			ITGA1
			MAZ
			SMAD6
			UBE2M
			SPRY2
			OSGIN1
			SLC40A1
			NOTCH1
			SOS1
			HS1BP3
			PTK2
			CAAP1
			FADD
			HCLS1
			CDC34
			TFDP1
			ATM
			APAF1
			PIM2
			MYD88
			NFKBID
			NFE2L2
			MELK
			STK4
			CASP3
			ERCC3
			NF1
			MTDH
			UBE2Z
			ERP29
			NFKB1
			NME2
			HRK
			SLC39A10
			MAP3K10
			FANK1
			ITSN1
			SRPK2
			SOD1
			RPS27L
			NCK1
			RNF144B
			ITCH
			VHL
			RASSF5
			SOX4
			STK17B
			IFIT2
			USP27X
			GSN
			SYCE3
			SPATA2
			PTMA
			MADD
			PTK2B
			ACTN4
			ZNF268
			ROCK1
			FOSL1
			TRAF4
			MTCH1
			BCL11B
			GRN
			CHST11
			CIB1
			TIA1
			PHLPP1
			ADAMTSL4
			RHBDD1
			STK3
			PRKCI
			TGFB3
			FNIP1
			KIFAP3
			BCL2
			DLX1
			EVI2B
			WNT1
			IGF2R
			ARHGEF18
			OXR1
			ING2
			DIABLO
			SYVN1
			SEPTIN7
			UFM1
			DIPK2A
			HERPUD1
			CIDEB
			MYBBP1A
			ATAD5
			RBM25
			NFKBIA
			SIAH2
			NUP62
			YWHAZ
			TYROBP
			JAK3
			RARG
			PIDD1
			FCER1G
			HSF1
			SOD2
			PLAGL2
			PRKCG
			BABAM2
			PPP2R1A
			KIF14
			FBXW7
			F2R
			RARA
			PLEKHN1
			GOLPH3
			MIR200B
			ADM
			SOCS3
			ZC3H12A
			ADNP
			DAXX
			COPS5
			GADD45B
			WDR73
			ARHGDIA
			ATAD3A
			TNIP2
			CBX4
			MIF
			GCLM
			SORT1
			ARHGEF11
			ARHGEF7
			SERPINB9
			ENDOG
			TAX1BP1
			SPHK1
			PAWR
			TGFBR1
			CHCHD10
			BMP6
			CARD8
			KLHL20
			INHBB
			PRKCD
			ARHGEF2
			JAK2
			KANK2
			RABGGTB
			HSPD1
			STAT3
			TGFB1
			ADAM17
			GCLC
			RGCC
			RFFL
			PRMT2
			MNDA
			MFN2
			HSPA1B
			GADD45A
			WDR35
			NACC2
			ZFAND6
			BCL2A1
			ARRB1
			PLAC8
			RNF157
			HRAS
			MAP3K20
			TERF1
			YWHAB
